# Supplementary material for: Impact of modified‐release opioid use on clinical outcomes following total hip and knee arthroplasty: a propensity score‐matched cohort study
Source: PubMed Central journal article supplement (PMC10952779; doi:10.1111/anae.16070), 2023-06-26

# Covariate Balance

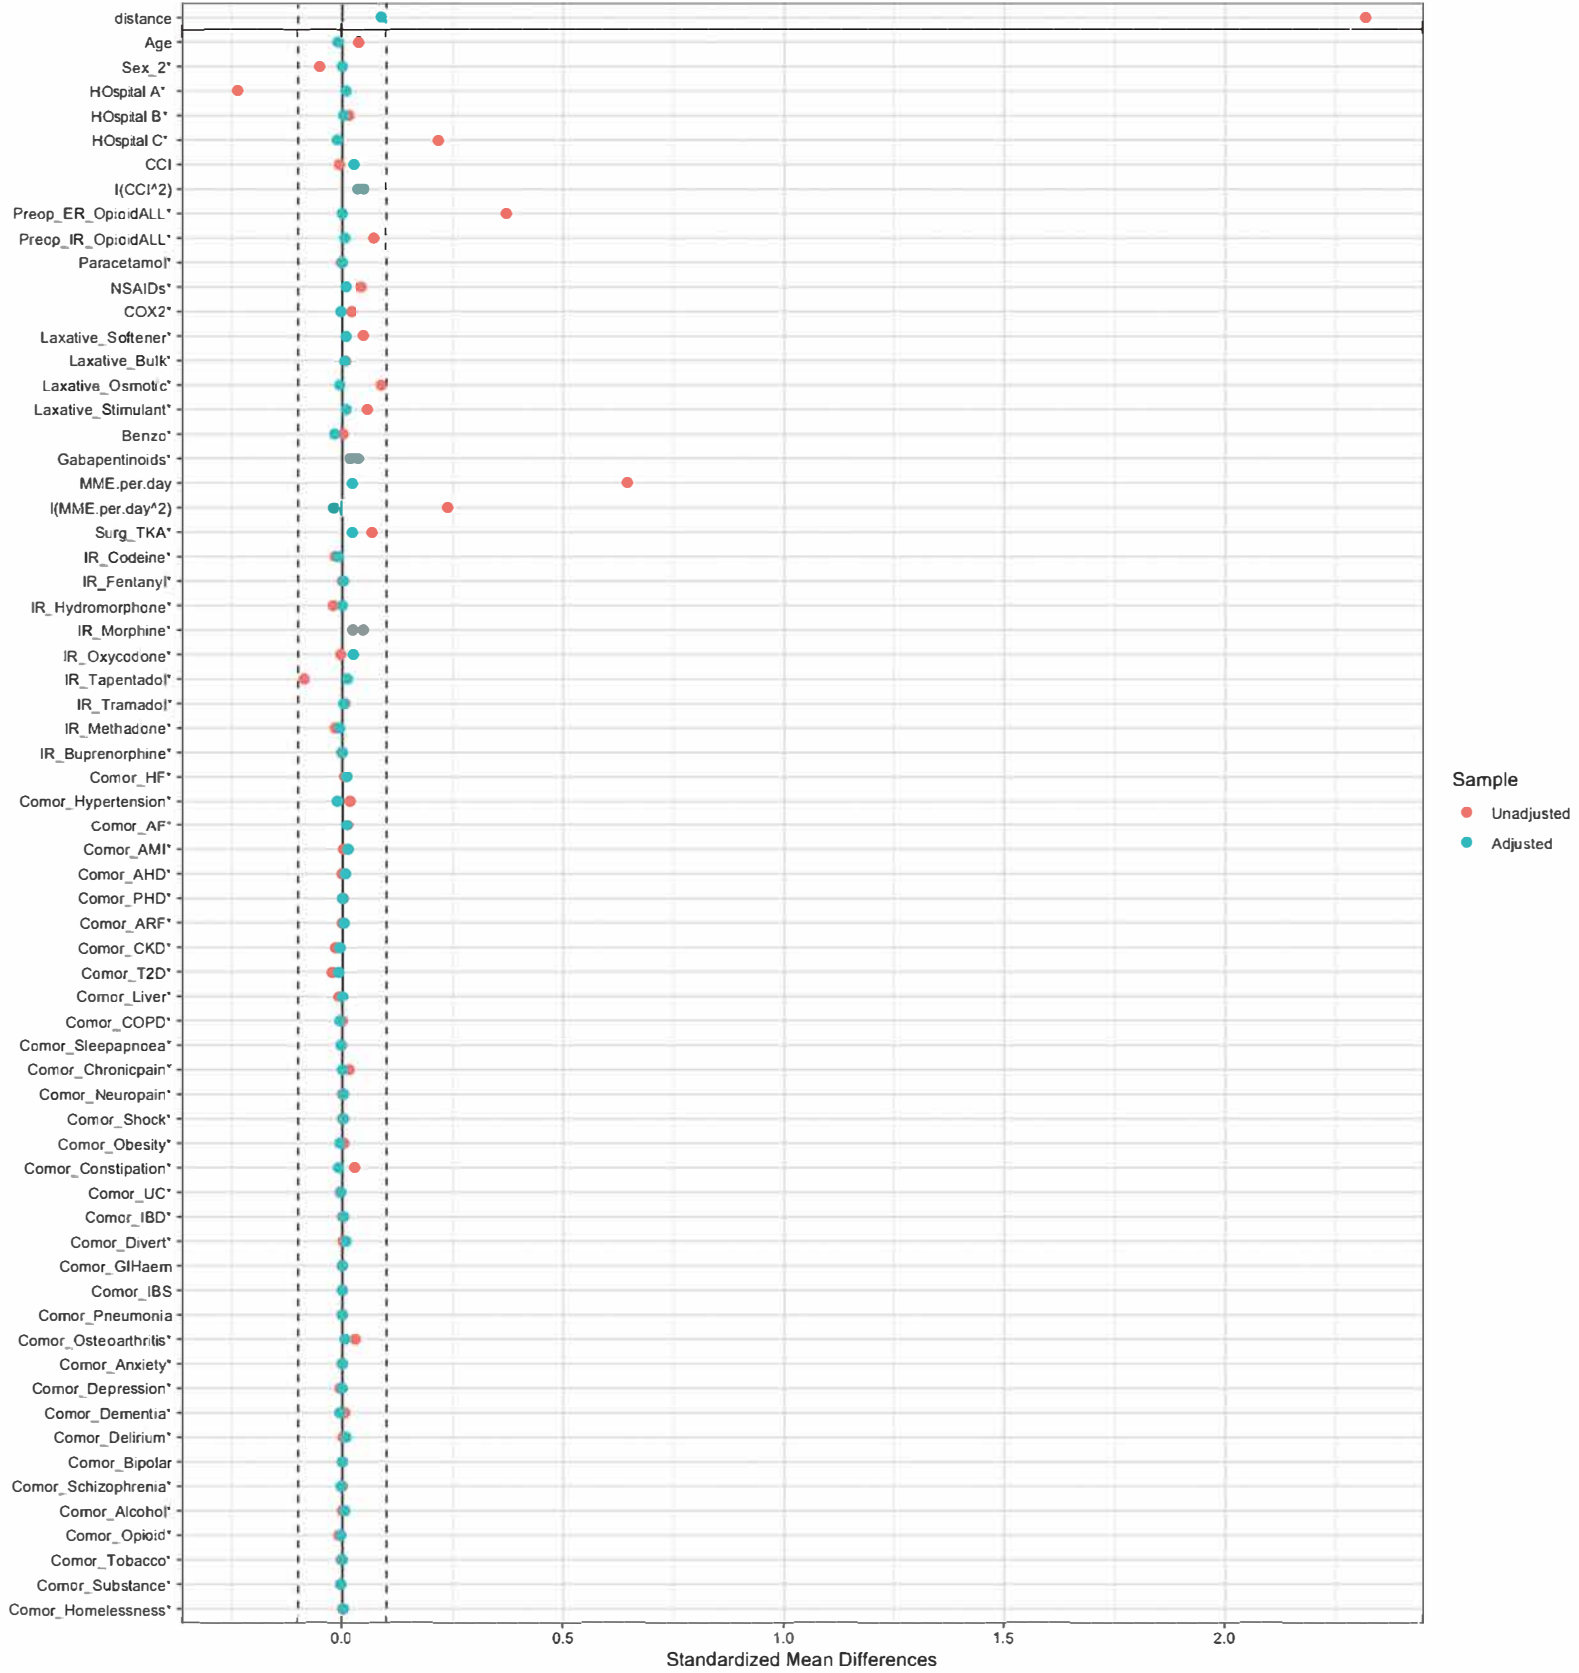

Supplement: ANAE-78-1237-s003.pdf [file ANAE-78-1237-s003.pdf]
